# Supplementary material
Source: HighWire-hosted journal article supplement (http://www.cmaj.ca/highwire/filestream/58461/field_highwire_adjunct_files/0/pg118.pdf)
Supplement: pg118.pdf [file pg118.pdf]

## PRODUCTION

**Production Manager • Gestionnaire de production**  
Kathryn A. Freamo

**Production Assistant • Assistante à la production**  
Nicole Barbeau

## ADVERTISING • PUBLICITÉ

**Manager, Journal Advertising**  
**Gestionnaire, Annonces publicitaires**  
Beverley Kirkpatrick

**Coordinator, Display Advertising**  
**Coordonnatrice de la publicité**  
Nancy Pope

**Assistant Manager, Classified Advertising**  
**Gestionnaire adjointe, annonces classées**  
Deborah Rodd

613 731-9331, fax 613 565-7488  
advertising@cma.ca

For information on how to advertise  
in any of the CMA journals  
[www.cma.ca](http://www.cma.ca)

Pour savoir comment placer une annonce  
dans les revues publiées par l'AMC  
[www.cma.ca](http://www.cma.ca)

**Marketing and Advertising Sales**  
**Marketing et publicité**  
Keith Health Care Inc.

|                  |                  |
|------------------|------------------|
| <b>Toronto</b>   | <b>Montréal</b>  |
| 905 278-6700     | 514 624-6979     |
| 800 661-5004     | 877 761-0447     |
| fax 905 278-4850 | fax 514 624-6707 |

All prescription drug advertisements have been cleared by the Pharmaceutical Advertising Advisory Board.

Toutes les annonces de médicaments prescrits ont été approuvées par le Conseil consultatif de publicité pharmaceutique.

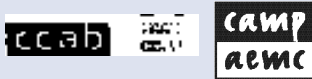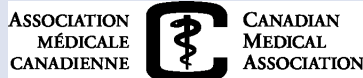

**President • Président**  
Allon Reddoch, MD

**Secretary General • Secrétaire général**  
Peter W. Vaughan, MD, MPH

**Director, Professional Development**  
**Directeur, Développement professionnel**  
Barbara Drew

**Manager, Publishing Services**  
**Gestionnaire, Services de publication**  
Jill Rafuse

**Publications Committee • Comité des publications**  
Stuart M. MacLeod, MD (Chairman • Président)  
Henry Haddad, MD  
Philip F. Hall, MD  
Barbara P. Lent, MD  
D'Arcy Lawrence Little, MD  
Jonathan L. Meakins, MD  
Mark Roper, MD  
W. Grant Thompson, MD

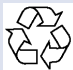

Printed on recycled paper • Imprimé sur papier recyclé

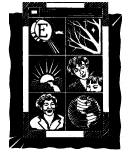

## Les interactions médicamenteuses : qui pr vient le patient?

La plupart des gens reconnaissent que les patients ont besoin de renseignements exacts et impartiaux sur les médicaments qu'ils prennent. Or, qui fournit ces renseignements? Les médecins et les pharmaciens, certes, mais les sociétés pharmaceutiques et de plus en plus de «services» d'ordonnance sur Internet jouent aussi un rôle en la matière. Dans quelle mesure l'obligation d'informer les clients devrait-elle incomber aux organismes gouvernementaux?

Ces questions ont été soulevées par un compte rendu paru récemment dans le *New York Times* selon lequel l'Hismanal (astemizole), un antihistaminique, a — enfin — été retiré du marché américain. L'astemizole et des médicaments semblables comme la terfenadine ont des interactions qui peuvent être mortelles avec certains médicaments et aliments.<sup>1</sup> Nous nous demandions combien de patients reçoivent de l'information sur les interactions médicamenteuses et nous avons utilisé la terfenadine comme exemple.

Nous avons commencé par effectuer une recherche sur le web. Nous n'avons pas trouvé de site canadien pour le fabricant de la terfenadine et le site américain n'affichait aucune liste, probablement parce que le médicament a été retiré du marché américain. Nous avons découvert que de plus en plus de sites Internet offrent des médicaments par correspondance, souvent sans ordonnance d'un médecin. Nous n'avons pu en trouver un qui fournissait de la terfenadine. (Presque tous annonçaient toutefois des prix réduits — notamment pour des «trousses de mariage» de citrate de sildénafil.) Il serait étonnant que ce genre de site fournisse spontanément des renseignements complets et impartiaux.

Le site web de la FDA<sup>2</sup> nous a facilement guidés vers 117 documents destinés aux consommateurs et portant sur la terfenadine : plusieurs traitaient des effets secondaires, des contre-indications et des interactions avec d'autres médicaments et aliments. Le site de Sant Canada<sup>3</sup> n'est malheureusement pas facile à utiliser. Même si nous avons essayé d'utiliser trois stratégies de recherche difficiles, nous n'avons pu trouver un seul document portant sur la terfenadine.

Nous avons appelé Sant Canada pour demander si nous avions raté quelque chose, si le site web du ministre comprenait des renseignements sur les dangers posés par la terfenadine.

On nous a répondu que non, car il s'agit d'un médicament prescrit. Il semble que Sant Canada estime s'être acquitté de ses obligations maintenant que la terfenadine n'est plus disponible en vente libre. Il incombe aux médecins et aux pharmaciens de fournir les renseignements. En terminant, on nous a fait la remarque pas très rassurante suivante : «Le patient peut poser des questions».

Comment les patients sauront-ils quelles questions poser? Parmi les substances qui peuvent agir avec la terfenadine, mentionnons les antifongiques l'azole, l'erythromycine et les autres antibiotiques macrolides, des inhibiteurs sélectifs de la recombinaison de la protéase du VIH, la quinine et le jus de pamplemousse. Les pharmaciens et tous les médecins qui prescrivent se rappelleront-ils tous de la liste complète des produits dans chaque cas?

Nous avons ensuite visité deux pharmacies et constaté que la terfenadine est dispensée sans renseignements provenant du fabricant sur le produit. En 1995, la FDA a lancé un programme dans le cadre duquel l'emballage de 90 % des médicaments prescrits contiendra, d'ici 2005, un encart d'information sur les effets secondaires et des interactions médicamenteuses possibles. Quelques exceptions prises, cette exigence n'existe pas au Canada. Les pharmaciens auprès desquels nous avons vérifié utilisent un logiciel commercial pour produire des feuilles d'information sur certains médicaments. Il est évident que la sécurité du patient occupe maintenant une «part de marché» et est passée au domaine du service à la clientèle «valeur ajoutée». Quand Sant Canada suivra-t-il l'exemple de la FDA pour assurer que les renseignements joints aux médicaments prescrits et destinés aux consommateurs sont complets, fiables et distribués chaque fois? Sant Canada devrait assumer sa responsabilité, qui est de veiller à ce que des renseignements exacts et impartiaux soient fournis non seulement aux médecins et aux pharmaciens, mais aussi aux patients.

### Références

1. Rangno R. Terfenadine therapy: Can we justify the risks? *CMAJ* 1997;157(1):37-8.
2. [www.fda.gov/cder/drug.htm](http://www.fda.gov/cder/drug.htm) (consulté le 29 juin 1999).
3. [www.hc-sc.gc.ca/hpb-dgps/thrapeutes](http://www.hc-sc.gc.ca/hpb-dgps/thrapeutes) (consulté le 29 juin 1999).
